# Supplementary material for: Label-free electrochemiluminescent immunosensor for α-fetoprotein: performance of Nafion–carbon nanodots nanocomposite films as antibody carriers
Source: Royal Society of Chemistry journal article supplement (doi:10.1039/c1cc16571b), 2011-11-18
Supplement: c1cc16571b.pdf [file c1cc16571b.pdf]

25 computer with BPCL program (Institute of Biophysics, Chinese Academy of Sciences) in  
26 conjunction with a CHI 660 electrochemical analyzer (Shanghai Chenghua Instrument  
27 Co., China). The electrochemical analyzer was used for controlling waveforms and  
28 potentials. The detail description of this system has been given in previous report [1].

29 A conventional three-electrode system was used for the electrolytic system, including a  
30 bare GCE or modified GC electrode as the working electrode, a platinum wire as the  
31 counter electrode and Ag/AgCl electrode (sat. KCl) as the reference electrode. A  
32 commercial 5 ml cylindroid glass cell was used as ECL cell, and it was placed directly in  
33 the front of the photomultiplier tube.

### 34 **1.3 Synthesis of CNDs through one step approach**

35 CNDs were synthesized according to the previous report [2]. Briefly, 1.1 g L-Ascorbic  
36 acid was dissolved in 25 mL deionized water and 25 mL ethanol to form a homogeneous  
37 solution. Then, 25 mL as-prepared solution was transferred into autoclave and heated at  
38 180 °C for 4 h and then cooled to room temperature naturally. The dark brown solution  
39 was extracted with dichloromethane. The water phase solution was dialyzed by  
40 employing dster dialysis membranes for three days to remove all impurity molecules. At  
41 last, a yellow CNDs aqueous solution was obtained.

### 42 **1.4 Preparation of ECL immunsensor**

43 First, a disk glassy carbon with 4 mm diameter as working electrode was polished to a  
44 mirror-like surface with define alumina powder, followed it was sonicated thoroughly in  
45 1M HNO<sub>3</sub>/1M HCl, 1M NaOH solution, ethanol and deionized water for 5 min,  
46 respectively.

47 The CNDs/Nafion solution was prepared by dispersing 40μL of 5% Nafion and

48 150 $\mu$ L resultant CNDs solution in 310 $\mu$ L ethanol, the modified electrode was prepared by  
49 dipping 4 $\mu$ L the prepared solution on the GC electrode, then dried it in the air. As a  
50 comparison, the Nafion/GC electrode was similarly prepared. Followed the electrode was  
51 immersed into anti-AFP solution (100 $\mu$ g/ml) for 1.5 h at room temperature, and then  
52 incubated into BSA solution (0.1wt.%) for about 1 h at room temperature to block  
53 possible active sites, then incubated in different concentration of AFP solution for 1h. The  
54 electrochemiluminescent sensing strategy for the detection of AFP was showed in scheme  
55 1. The prepared modified electrode could be stored in refrigerator at 4 °C when not in use.

56

## 57 **2. UV-vis adsorption of CNDs**

58 Fig.S1 depicted the UV-vis absorption spectra of the as-prepared CNDs. A strong  
59 absorption band at 262.8 nm was observed with a narrow fwhm of 40nm.

60

## 61 **3. Optimization of experimental conditions**

62 The amount of Nafion and CNDs in the CNDs-Nafion nanocomposite film greatly  
63 affected the ECL response of luminol on the resultant ECL platform. Through simply  
64 modulating the Nafion and CNDs amount in the modified solution, the optimal  
65 composing of CNDs-Nafion nanocomposite film for luminol ECL system could be  
66 achieved. Fig.S1Aa exhibited that, with the increasing volume of CNDs in the modified  
67 solution from 50 to 250  $\mu$ L, the ECL response of this sensor increased firstly, then  
68 decreased, and reached maximum at 150  $\mu$ L. The low concentration of CNDs could lead  
69 in homogeneously and finely disperse of CNDs in a certain concentration (0.4%) Nafion  
70 solution. Thus it facilitated the electron transfer between electrode matrix and solution,

71 leading to the increased ECL response. However, too much CNDS in the modified  
72 solution resulted in the formation of cluster of CNDS, reducing the area-to-volume ration.  
73 Similarly, the ECL emission of luminol at this sensor increased with the increasing  
74 concentration of Nafion. While, when the concentration of Nafion beyond 0.4%, the ECL  
75 intensity decreased. So, per 500  $\mu$ l modified solution contained 150  $\mu$ l CNDS solution and  
76 0.4% Nafion was employed as the optimal composing.

77 The important parameters that determine the performance of an immunosensor are the  
78 amount of immobilized antibody on the sensing interface and the incubation time  
79 required for the antigen–antibody immuno-reaction. The robust ECL decreased ratio  
80 (referred as described ECL percentage), which means the decreased ECL intensity of the  
81 immunosensor after reaction occupys the ratio of this initial ECL response, was employed  
82 as the guideline to evaluate these two important parameters. During the procedure of  
83 fabricating immunosensor, it took some time for immobilizing antibody onto the sensing  
84 interface. Nafion was a well known polyanionic perfluorosulfonated ionomer with rich  
85 negative charge. Moreover, by the reason of rich hydroxyl and carboxyl group on the  
86 CNDS, thus such CNDS-Nafion nanocomposite film could entrap antibody via the  
87 electrostatic adsorption. And compared with other nano-materials, CNDS have huge  
88 specific surface area. With the addition of CNDS into Nafion film, it made the  
89 nanocomposite film to be more porous. All these facilitated the CNDS-Nafion  
90 nanocomposite film being a potential and effective antibody carriers. As seen from  
91 [Fig.S2Aa](#), the decreased ECL percentage increased with the increment of incubation time,  
92 then leveled off after 60 min. As a result, the optimum immobilized period was set at 60  
93 min for the incubation steps in this study.

94 To obtain the optimization of time required for completeness of the immunoreactions,  
95 anti-AFP/CNDs/Nafion/GCE modified electrode were incubated in 80 ng/mL AFP  
96 solution for different time periods. Fig.S2Ba was evidently described that only the  
97 incubated time arrived 90 mins or more exhibited a stable response showing the complete  
98 interaction between anti-AFP and AFP. So an optimized incubation time of 90min was  
99 chose for the incubation steps in this investigation.

100

#### 101 **4. Real Sample Detection**

102 This ECL immunosensor was utilized to analysis AFP in the serum samples. As can be  
103 seen in Table 1, the AFP concentration of dilution solution of human serum sample could  
104 be detected by the prepared immunosensor. After introduction of different concentrations  
105 of AFP solution into the samples, it is found that recoveries were in the range of  
106 93.4~110.0%. These results indicated that this biosensor can be used in the practice  
107 sample analysis.

108

109 Table S1 Real sample detection and Recoveries

| <u>Sample</u><br><u>(ELISA method)</u> | <u>AFP</u><br><u>concentration</u><br><u>of the serum</u><br><u>sample after</u><br><u>dilution</u><br><u>(ng/ml)</u> | <u>add AFP</u><br><u>(ng/ml)</u> | <u>found</u><br><u>(ng/ml)</u> | <u>Recovery</u><br><u>(%)</u> |
|----------------------------------------|-----------------------------------------------------------------------------------------------------------------------|----------------------------------|--------------------------------|-------------------------------|
| <u>Human blood</u>                     |                                                                                                                       | <u>0</u>                         | <u>0.100</u>                   | <u>93.4</u>                   |
| <u>Serum</u>                           | <u>0.107</u>                                                                                                          | <u>0.250</u>                     | <u>0.360</u>                   | <u>101.0</u>                  |
| <u>(AFP32.23 ng/ml)</u>                |                                                                                                                       | <u>0.500</u>                     | <u>0.600</u>                   | <u>98.8</u>                   |
|                                        |                                                                                                                       | <u>0.800</u>                     | <u>1.000</u>                   | <u>110.0</u>                  |

110

111

112 **References**

113 S1 Lin, Y., Dai, H., Yang, C., Lin, S., Chen, G., 2011. *Electroanalysis*, 23, 1260–1266.

114 S2 Zhang, B., Liu, C.Y., Liu, Y., 2010. *J. Inorg. Chem.* 22, 4411–4414.

115

116

117

118

119

120

121

122

123

124

125

126

127

128

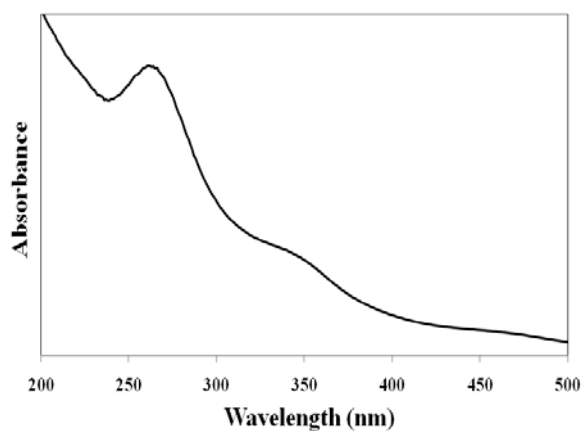

129

130 **Figure S1 UV-vis absorption spectra of CNDs.**

131

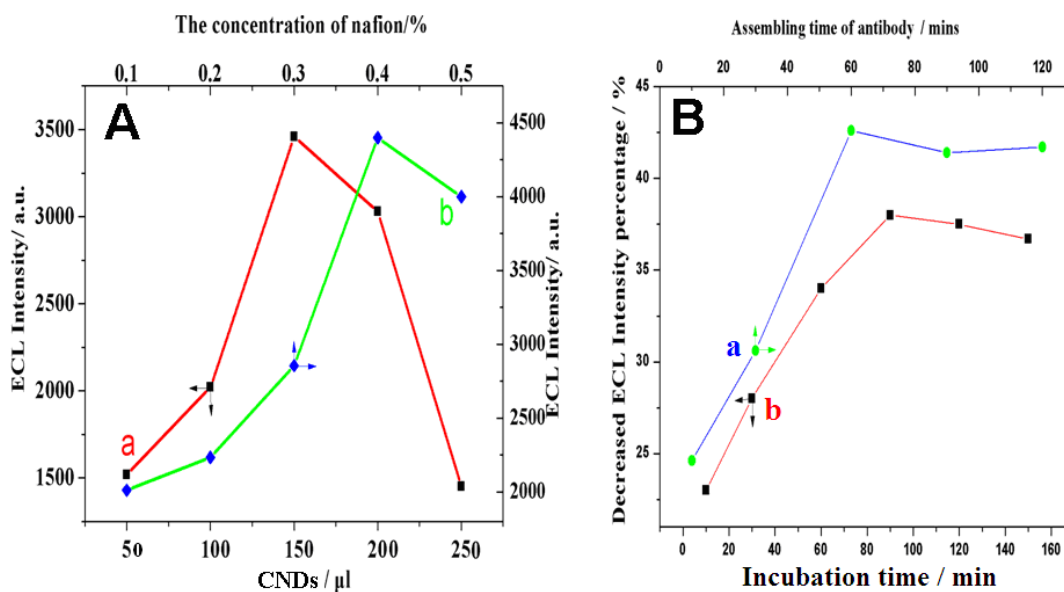

132

133

❖ **Figure S2 (A)** Effects of volum of CNDs(a) and the concentration of Nafion(b) on the ECL emission of luminol on CNDs/Nafion nanocomposite modified electrode.

134

135 **(B)** Effects of the self-assembly time of anti-AFP(a) and the incubation time (b) on the  
136 decreased ECL intensity percentage of luminol.

137 Conditions: pH 8.0PBS contained  $5 \times 10^{-5}$  mol/L Luminol. AFP:  $100 \mu\text{gml}^{-1}$ . Potential

138 windows: 0.2-0.8V, scan rate: 0.1V/s.
